# Supplementary material for: School Students’ Concerns and Support after One Year of COVID-19 in Austria: A Qualitative Study Using Content Analysis
Source: MDPI journal article supplement (doi:10.3390/healthcare10071334), 2022-07-18
Supplement: s1 [file s1]

**Category system that emerged from the data for Question 1: "What currently gives you most cause for concern?"**

|                                                        | <b>N</b> | <b>%</b> |
|--------------------------------------------------------|----------|----------|
| <b>School-related concerns</b>                         | 135      | 63,1%    |
| Stress at school                                       | 93       | 43,5%    |
| School organisation                                    | 19       | 8,9%     |
| Graduation                                             | 17       | 7,9%     |
| Teachers                                               | 6        | 2,8%     |
| <b>Restrictions</b>                                    | 75       | 35,0%    |
| Restrictions of public life/home confinement           | 29       | 13,6%    |
| Lack of activities with friends                        | 21       | 9,8%     |
| Lack of social contacts                                | 13       | 6,1%     |
| Lack of exercise                                       | 5        | 2,3%     |
| Travel restrictions                                    | 4        | 1,9%     |
| Quarantine                                             | 3        | 1,4%     |
| <b>Self-related concerns</b>                           | 68       | 31,8%    |
| Concerns about the future                              | 22       | 10,3%    |
| Negative thoughts and emotions                         | 13       | 6,1%     |
| Lack of drive                                          | 8        | 3,7%     |
| Missing out on something                               | 7        | 3,3%     |
| Mental health stresses                                 | 6        | 2,8%     |
| Physical health stresses                               | 6        | 2,8%     |
| Loneliness and social isolation                        | 3        | 1,4%     |
| Body-related worries                                   | 3        | 1,4%     |
| <b>Family, relationship and interpersonal problems</b> | 27       | 12,6%    |
| Family problems                                        | 9        | 4,2%     |
| Relationship troubles                                  | 7        | 3,3%     |
| Relational problems with others                        | 6        | 2,8%     |
| Worrying about others                                  | 5        | 2,3%     |
| <b>The pandemic</b>                                    | 25       | 11,7%    |
| General statements                                     | 12       | 5,6%     |
| Uncertainty of the future                              | 13       | 6,1%     |
| <b>Current societal development</b>                    | 11       | 5,1%     |
| <b>Other concerns</b>                                  | 11       | 5,1%     |
| <b>Consumption</b>                                     | 5        | 2,3%     |
| Alcohol                                                | 1        | 0,5%     |
| Drugs                                                  | 1        | 0,5%     |
| Mobile phone/laptop usage                              | 2        | 0,9%     |
| Sex                                                    | 1        | 0,5%     |
| <b>No stressors</b>                                    | 7        | 3,3%     |

**Category system that emerged from the data for Question 2: "What is currently providing you with the most support?"**

|                                | <b>N</b> | <b>%</b> |
|--------------------------------|----------|----------|
| <b>Social contacts</b>         | 153      | 71,5%    |
| Friends                        | 64       | 29,9%    |
| Family                         | 36       | 16,8%    |
| Partner                        | 21       | 9,8%     |
| Talking to someone             | 19       | 8,9%     |
| Classmates                     | 6        | 2,8%     |
| Best friend                    | 4        | 1,9%     |
| Other people                   | 3        | 1,4%     |
| <b>Recreational activities</b> | 84       | 39,3%    |
| Sports                         | 30       | 14,0%    |
| Listening to music             | 24       | 11,2%    |
| Going for a walk               | 9        | 4,2%     |
| Hobbies (general category)     | 8        | 3,7%     |
| Relaxation                     | 8        | 3,7%     |
| Reading                        | 5        | 2,3%     |
| <b>Attitudes and abilities</b> | 39       | 18,2%    |
| Mental abilities               | 30       | 14,0%    |
| Structure                      | 5        | 2,3%     |
| Abreact                        | 4        | 1,9%     |
| <b>Distraction</b>             | 36       | 16,8%    |
| Gaming                         | 10       | 4,7%     |
| Television                     | 8        | 3,7%     |
| Social Media Activities        | 6        | 2,8%     |
| Surfing the internet           | 5        | 2,3%     |
| Distraction (general category) | 5        | 2,3%     |
| Shopping                       | 2        | 0,9%     |
| <b>Escape</b>                  | 23       | 10,7%    |
| Sleeping                       | 12       | 5,6%     |
| Eating                         | 6        | 2,8%     |
| Substances                     | 5        | 2,3%     |
| <b>Creativity</b>              | 10       | 4,7%     |
| Writing/Drawing                | 7        | 3,3%     |
| Making music                   | 3        | 1,4%     |
| <b>Professional help</b>       | 7        | 3,3%     |
| <b>Pets</b>                    | 5        | 2,3%     |
| <b>Faith</b>                   | 3        | 1,4%     |
| <b>School as a resource</b>    | 3        | 1,4%     |
| I don't know                   | 3        | 1,4%     |
| Nothing                        | 8        | 3,7%     |
| I don't need help              | 3        | 1,4%     |
